# Supplementary material
Source: PubMed Central journal article supplement (PMC6813552)
Supplement: oc9b00918_si_001.pdf [file oc9b00918_si_001.pdf]

## Supplementary Information for

### **Chemical fingerprint of Zn-hydroxyapatite in the early stages of osteogenic differentiation**

Alessandra Procopio<sup>1§</sup>, Emil Malucelli<sup>1§\*</sup>, Alexandra T.J. Pacureanu<sup>2</sup>, Concettina Cappadone<sup>1</sup>, Giovanna Farruggia<sup>1,6</sup>, Azzurra Sargenti<sup>1</sup>, Sara Castiglioni<sup>3</sup>, Davide Altamura<sup>4</sup>, Andrea Sorrentino<sup>5</sup>, Cinzia Giannini<sup>4</sup>, Eva Pereiro<sup>5</sup>, Peter Cloetens<sup>2</sup>, Jeanette A.M. Maier<sup>3&</sup>, Stefano Iotti<sup>1,6&</sup>.

<sup>1</sup>Department of Pharmacy and Biotechnology, University of Bologna, Bologna, Italy;

<sup>2</sup>ID16A Beamline, ESRF, the European Synchrotron, Grenoble, France

<sup>3</sup>Department of Biomedical and Clinical Sciences L. Sacco, University of Milan, Milan, Italy;

<sup>4</sup>Institute of Crystallography, National Research Council, Bari, Italy

<sup>5</sup>ALBA Synchrotron Light Source, Cerdanyola del Vallès, Barcelona, Spain

<sup>6</sup>National Institute of Biostructures and Biosystems, Rome, Italy

<sup>§</sup>These authors equally contributed to this work

\* To whom correspondence should be addressed: [emil.malucelli@unibo.it](mailto:emil.malucelli@unibo.it)

<sup>&</sup>Both authors share senior authorship

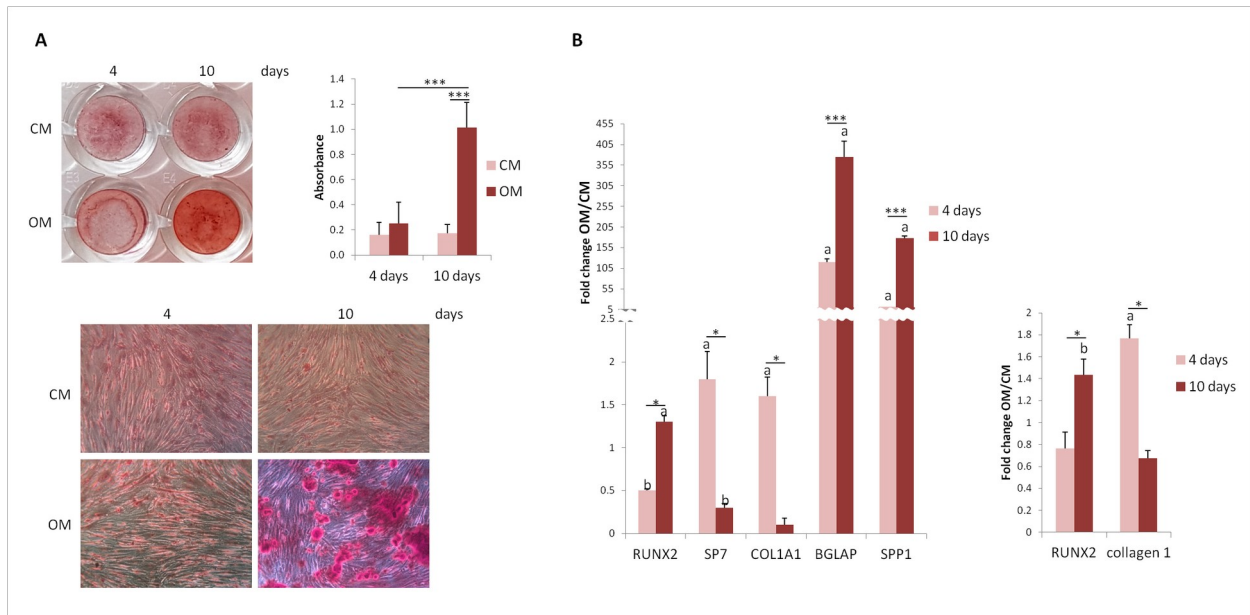

**Figure S1.** (A) Alizarin Red staining was performed after exposure to culture medium (CM) or osteogenic medium (OM) for 4 and 10 days. Photographs of a representative plate (upper left panel) and photographs taken at 10X magnification (lower panel) are shown. After acid extraction the absorbance was measured at 562 nm (upper right panel). The results are shown as the mean  $\pm$  standard deviation of four experiments in triplicate. Statistical significance was determined using Student's t test. \*\*\* $p < 0.001$ . (B) Real-Time PCR (left panel) was performed three times in triplicate on RNA extracted from bMSC exposed to CM or OM for 4 and 10 days using primers designed on *RUNX2*, *SP7*, *COL1A1*, *BGLAP* and *SPP1* sequence. ELISA for RUNX2 and collagen type 1 (right panel) was conducted on extracts from bMSC cultured in CM or OM for 4 and 10 days. All the values were normalized with respect to their controls cultured in CM. Statistical significance was determined using Student's t test. \* $p < 0.05$ , \*\*\* $p < 0.001$ . Different letters indicate the statistically significant effect of OM vs CM (a:  $p < 0.05$ , b:  $p < 0.01$ ).

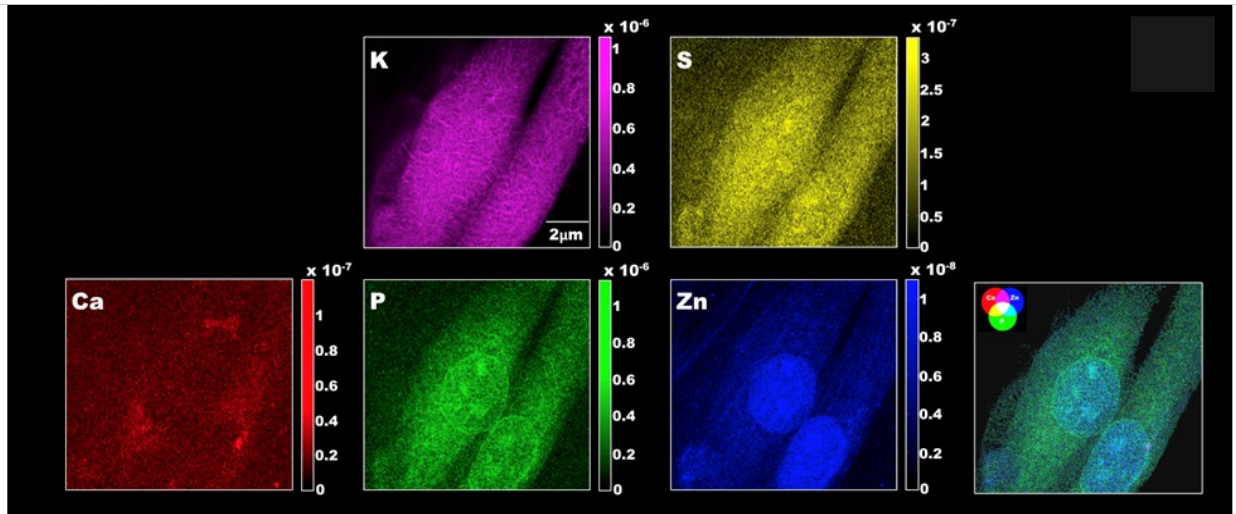

**Figure S2.** 2D x-ray fluorescence maps (pixel size 70 nm, expressed in areal mass ( $\text{g}/\text{cm}^2$ )) of non-induced bMSC. Magenta: elemental map of K. Yellow: elemental map of S. Red: elemental map of Ca. Green: elemental map of P. Blue: elemental map of Zn. Composite elemental distribution of Ca, P and Zn to better understand the correspondence of elements accumulation.

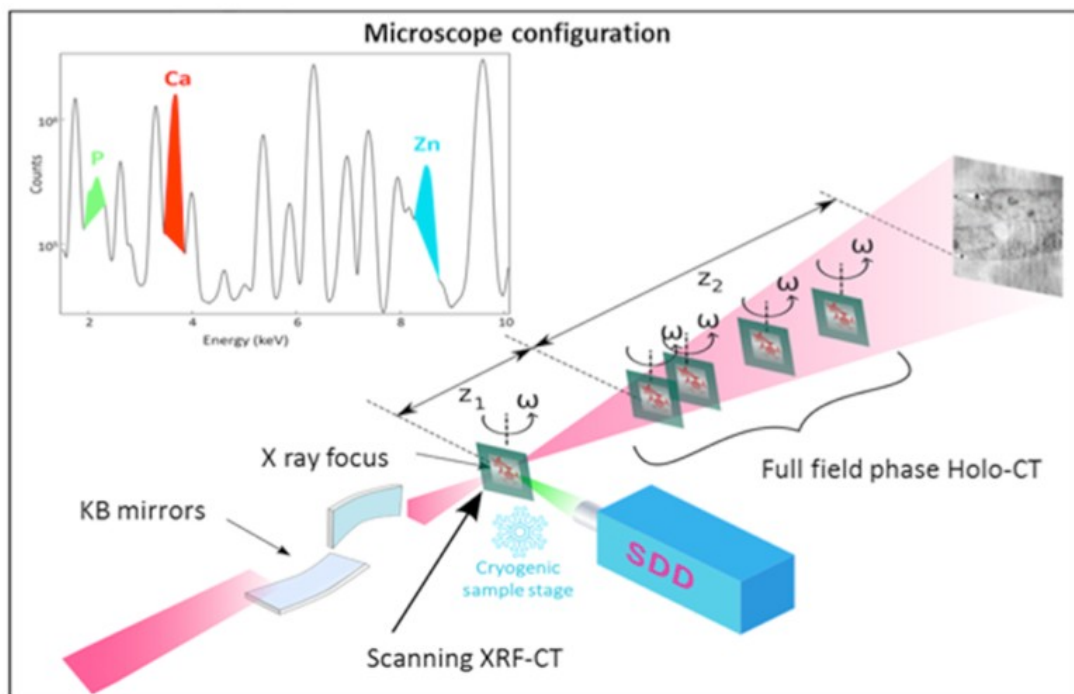

**Figure S3.** The experimental set-up at the ID16A-NI ‘Nano-Imaging’ beamline of the ESRF Synchrotron.

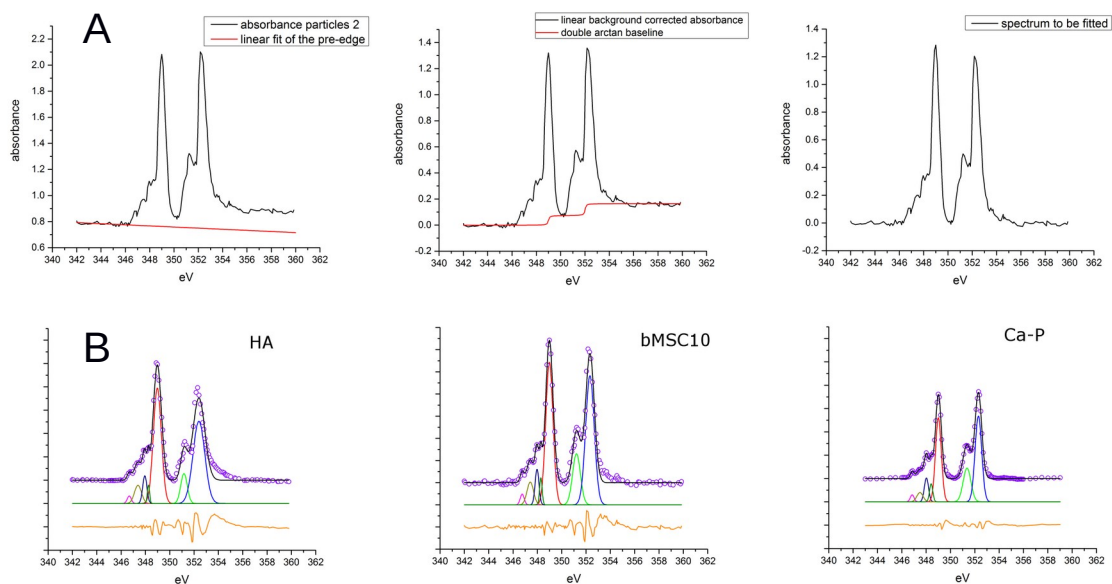

**Figure S4.** Panel A: Linear background (left) and double arctan subtraction (middle) showed for the bMSC at 10 days sample. The last plot on the right (“subtracted data”) is the experimental spectrum on which the Gaussians fit was performed. Panel B: Ca L edge Gaussian fits for some subtracted data reported in the main text (HA left, bMSC10 middle and Ca-P right). The experimental points (empty circles) are over imposed with the cumulative fit (black line) which is simply the sum of the used Gaussian curves also reported (coloured lines). The corresponding residual, calculated as the difference between the subtracted data and the cumulative fit is reported in orange. In the plots, both the Gaussians curves and the residual are vertically shifted for sake of clarity.

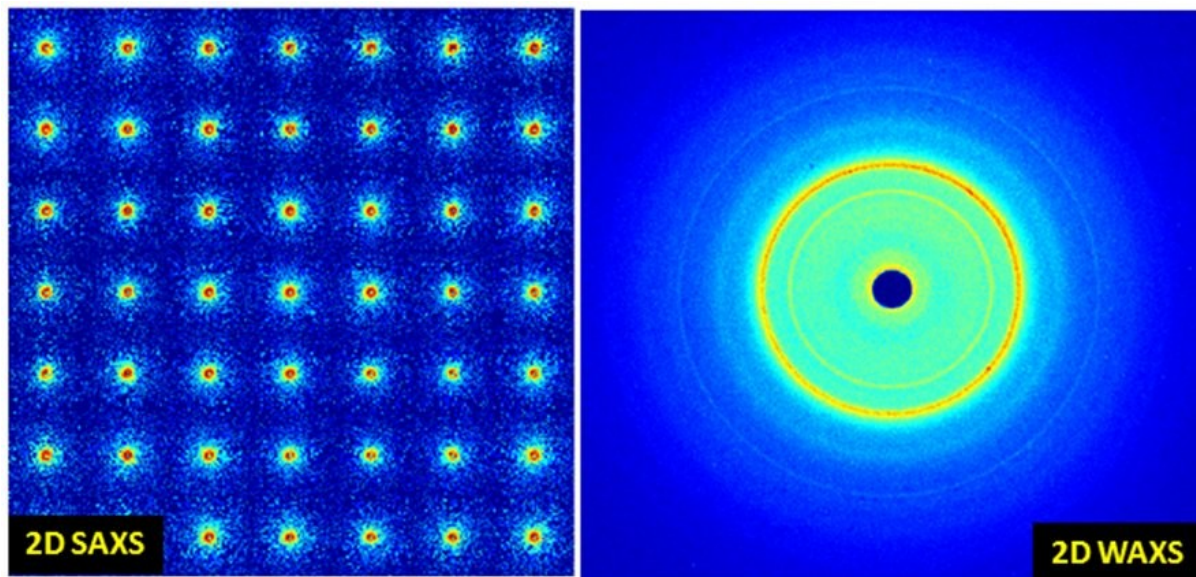

**Figure S5.** Scanning SAXS 2D data recorded across a  $0.9 \times 0.9 \text{ mm}^2$  area (left); 2D WAXS (right), averaged in the same area

**HA REFERENCE FIT (peaks numbers are not following the energy position)**

| PEAK            | PARAMETER | VALUE     | STANDARD ERROR |
|-----------------|-----------|-----------|----------------|
| Peak1(Gaussian) | xc        | 348.98026 | 0.0098         |
| Peak1(Gaussian) | A         | 0.81583   | 0.02125        |
| Peak1(Gaussian) | w         | 0.77461   | 0.02471        |
| Peak2(Gaussian) | xc        | 351.16799 | 0.04205        |
| Peak2(Gaussian) | A         | 0.17238   | 0.02689        |
| Peak2(Gaussian) | w         | 0.63182   | 0.09627        |
| Peak3(Gaussian) | xc        | 352.39493 | 0.01798        |
| Peak3(Gaussian) | A         | 0.85465   | 0.02912        |
| Peak3(Gaussian) | w         | 1.13889   | 0.0489         |
| Peak4(Gaussian) | xc        | 346.67251 | 0.18247        |
| Peak4(Gaussian) | A         | 0.02713   | 0.03385        |
| Peak4(Gaussian) | w         | 0.39838   | 0.37859        |
| Peak5(Gaussian) | xc        | 347.38889 | 0.2512         |
| Peak5(Gaussian) | A         | 0.11324   | 0.12111        |
| Peak5(Gaussian) | w         | 0.6829    | 0.72708        |
| Peak6(Gaussian) | xc        | 347.94857 | 0.09769        |
| Peak6(Gaussian) | A         | 0.10287   | 0.14565        |
| Peak6(Gaussian) | w         | 0.4067    | 0.37902        |
| Peak7(Gaussian) | xc        | 348.25275 | 0.07655        |
| Peak7(Gaussian) | A         | 0.03621   | 0.06602        |
| Peak7(Gaussian) | w         | 0.21488   | 0.19018        |

**PARTICLE bMSC at 10 days FIT**

|                 |    |           |         |
|-----------------|----|-----------|---------|
| Peak1(Gaussian) | xc | 348.9898  | 0.00702 |
| Peak1(Gaussian) | A  | 0.95868   | 0.01968 |
| Peak1(Gaussian) | w  | 0.70077   | 0.01743 |
| Peak2(Gaussian) | xc | 351.21612 | 0.0261  |
| Peak2(Gaussian) | A  | 0.37274   | 0.02898 |
| Peak2(Gaussian) | w  | 0.75995   | 0.06302 |
| Peak3(Gaussian) | xc | 352.32152 | 0.00993 |
| Peak3(Gaussian) | A  | 1.0346    | 0.02583 |
| Peak3(Gaussian) | w  | 0.83484   | 0.02441 |
| Peak4(Gaussian) | xc | 346.75437 | 0.10632 |
| Peak4(Gaussian) | A  | 0.03895   | 0.02971 |
| Peak4(Gaussian) | w  | 0.38001   | 0.2394  |
| Peak5(Gaussian) | xc | 347.41877 | 0.11025 |
| Peak5(Gaussian) | A  | 0.13713   | 0.07904 |
| Peak5(Gaussian) | w  | 0.62696   | 0.40037 |
| Peak6(Gaussian) | xc | 347.97447 | 0.06242 |
| Peak6(Gaussian) | A  | 0.12703   | 0.09315 |
| Peak6(Gaussian) | w  | 0.37246   | 0.19573 |
| Peak7(Gaussian) | xc | 348.28872 | 0.05715 |
| Peak7(Gaussian) | A  | 0.06396   | 0.05212 |
| Peak7(Gaussian) | w  | 0.24608   | 0.09938 |

### PARTICLE bMSC at 4 days FIT

|                 |    |           |         |
|-----------------|----|-----------|---------|
| Peak1(Gaussian) | xc | 348.9931  | 0.00559 |
| Peak1(Gaussian) | A  | 0.27314   | 0.00652 |
| Peak1(Gaussian) | w  | 0.40554   | 0.01597 |
| Peak2(Gaussian) | xc | 351.3148  | 0.04513 |
| Peak2(Gaussian) | A  | 0.12128   | 0.00744 |
| Peak2(Gaussian) | w  | 0.82879   | 0.12052 |
| Peak3(Gaussian) | xc | 352.30000 | 0.00761 |
| Peak3(Gaussian) | A  | 0.43744   | 0.00631 |
| Peak3(Gaussian) | w  | 0.58772   | 0.01786 |
| Peak4(Gaussian) | xc | 346.8634  | 0.27232 |
| Peak4(Gaussian) | A  | 0.00632   | 0.00603 |
| Peak4(Gaussian) | w  | 0.43784   | 0.73408 |
| Peak5(Gaussian) | xc | 348.5958  | 0.12042 |
| Peak5(Gaussian) | A  | 0.23678   | 0.01162 |
| Peak5(Gaussian) | w  | 2.29355   | 0.32177 |

### Ca-P FIT

|                 |    |           |         |
|-----------------|----|-----------|---------|
| Peak1(Gaussian) | xc | 349.01023 | 0.00427 |
| Peak1(Gaussian) | A  | 0.43131   | 0.0071  |
| Peak1(Gaussian) | w  | 0.56216   | 0.01111 |
| Peak2(Gaussian) | xc | 351.35918 | 0.0126  |
| Peak2(Gaussian) | A  | 0.23067   | 0.00814 |
| Peak2(Gaussian) | w  | 0.74947   | 0.03063 |
| Peak3(Gaussian) | xc | 352.29333 | 0.00466 |
| Peak3(Gaussian) | A  | 0.50254   | 0.00816 |
| Peak3(Gaussian) | w  | 0.64214   | 0.01109 |
| Peak4(Gaussian) | xc | 346.8544  | 0.05433 |
| Peak4(Gaussian) | A  | 0.02318   | 0.00914 |
| Peak4(Gaussian) | w  | 0.36179   | 0.10812 |
| Peak5(Gaussian) | xc | 347.49449 | 0.12196 |
| Peak5(Gaussian) | A  | 0.05086   | 0.03203 |
| Peak5(Gaussian) | w  | 0.6       | 0.36372 |
| Peak6(Gaussian) | xc | 348.0256  | 0.03131 |
| Peak6(Gaussian) | A  | 0.08818   | 0.03884 |
| Peak6(Gaussian) | w  | 0.40528   | 0.12095 |
| Peak7(Gaussian) | xc | 348.41407 | 0.03783 |
| Peak7(Gaussian) | A  | 0.05208   | 0.01959 |
| Peak7(Gaussian) | w  | 0.31695   | 0.06955 |

**Table S1. Fitting results.** The used formula for the Gaussian function is:

$$y = \left( \frac{A}{w \cdot \sqrt{\frac{PI}{4 \cdot \ln(2)}}} \right) e^{\left( -4 \ln(2) \times \left( \frac{(x-xc)^2}{w^2} \right) \right)}$$

Fits were shifted to have the L<sub>2</sub> peak centered at 352.3eV.



| sample   | crystallographic unit cell parameters |             |             | cell volume | volume contraction factor |
|----------|---------------------------------------|-------------|-------------|-------------|---------------------------|
|          | a (Å)                                 | b (Å)       | c (Å)       |             |                           |
| 10days   | 9.480±0.005                           | 9.480±0.005 | 6.906±0.005 | 538±2       | 0.97±0.01                 |
|          | alpha (°)                             | beta (°)    | gamma (°)   |             |                           |
|          | 90                                    | 90          | 120         |             |                           |
| 10days_A | a (Å)                                 | b (Å)       | c (Å)       |             |                           |
|          | 9.521±0.005                           | 9.521±0.005 | 6.910±0.005 | 543±2       | 0.98±0.01                 |
|          | alpha (°)                             | beta (°)    | gamma (°)   |             |                           |
|          | 90                                    | 90          | 120         |             |                           |
| 4days    | a (Å)                                 | b (Å)       | c (Å)       |             |                           |
|          | 9.579±0.005                           | 9.579±0.005 | 6.949±0.005 | 552±2       | 1                         |
|          | alpha (°)                             | beta (°)    | gamma (°)   |             |                           |
|          | 90                                    | 90          | 120         |             |                           |

**Table S2.** Crystallographic unit cell parameters (a, b, c, alpha, beta, gamma) and cell volume (V), after Rietveld analysis, and relative volume contraction factor X, given by the ratio V(10 days)/V(4 days).

**Movie S1.**

Virtual stack of x-ray phase-contrast tomography of bMSC after 4 days of the osteogenic induction (pixel size 50 nm).

**Movie S2.**

Virtual stack of x-ray phase-contrast tomography of bMSC after 10 days of the osteogenic induction (pixel size 15 nm).

**Movie S3.**

3D nano-rendering of x-ray phase-contrast tomography of bMSC after 4 days of differentiation.

**Movie S4.**

3D nano-rendering of phase-contrast tomography of bMSC after 10 days of differentiation.

**Movie S5.**

Virtual stack of X-ray fluorescence projections of Ca, P and Zn of bMSC after 10 days of the osteogenic induction (pixel size 125 nm). Red: virtual stack projections of Ca. Green: virtual stack projections of P. Blue: virtual stack projections of Zn. Composite elemental distribution of Ca, P and Zn.

**Movie S6.**

Zoomed 3D nano-rendering of Ca (red spots), P (green spots) and Zn (blue spots) of bMSC after 10 days of the osteogenic induction. In cyan was represented the nucleus.
